# Supplementary material for: One-step anion-assisted electrodeposition of ZnO nanofibrous networks as photoanodes for dye-sensitized solar cells
Source: Royal Society of Chemistry journal article supplement (doi:10.1039/c5ra13623g), 2015-01-01
Supplement: c5ra13623g1.pdf [file c5ra13623g1.pdf]

## Supporting Information

### One-Step Anion-Assisted Electrodeposition of ZnO Nanofibrous Networks as Photoanodes for Dye-Sensitized Solar Cells

İlkay Şişman,<sup>a,\*</sup> Melike Can,<sup>a</sup> Bahar Ergezen,<sup>a</sup> and Mustafa Biçer,<sup>b</sup>

<sup>a</sup>*Department of Chemistry, Faculty of Arts and Sciences, Sakarya University, 54187, Sakarya,  
Turkey*

<sup>b</sup>*Department of Energy Systems Engineering, Faculty of Technology in Elbistan,  
Kahramanmaraş Sütçü İmam University, 46300, Kahramanmaraş, Turkey*

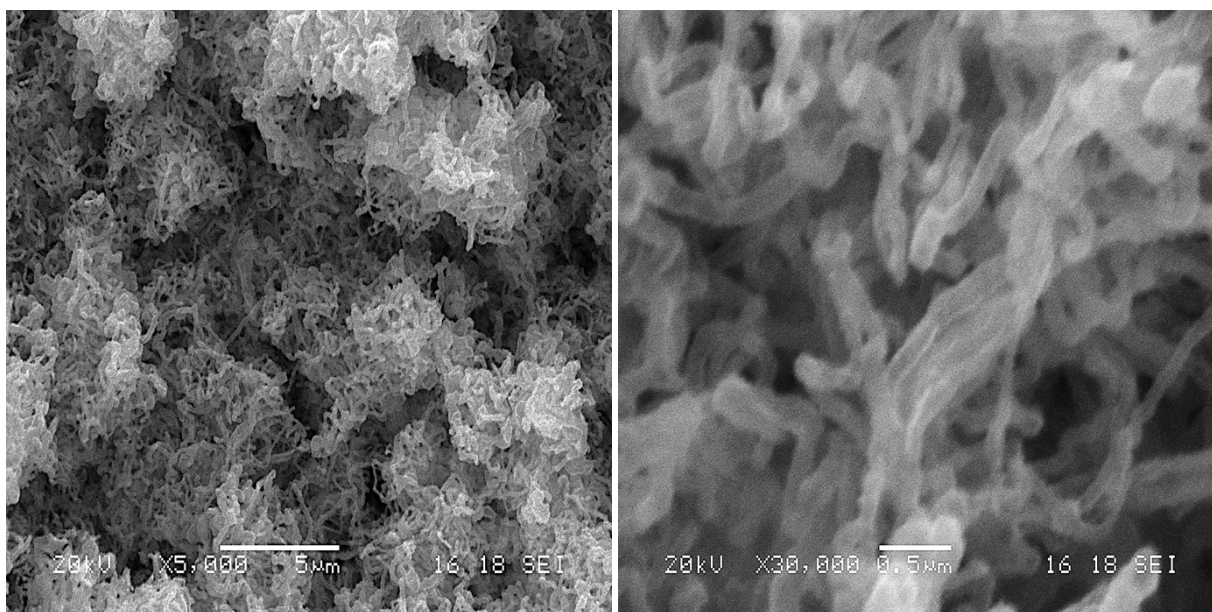

**Figure S1.** SEM images of ZnO NFs at different magnifications.

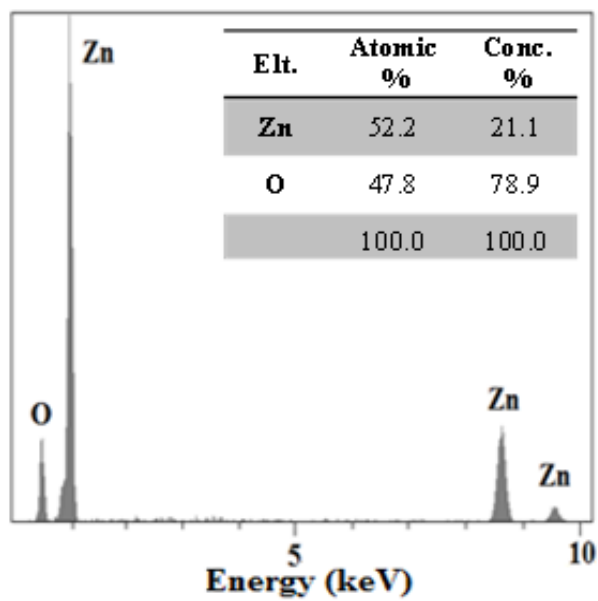

**Figure S2.** EDS spectrum of ZnO NFs.

EDS measurement has been carried out to verify the elements in the NFs sample.
